# Supplementary material for: Evaluation of the Therapeutical Effect of Matricaria Chamomilla Extract vs. Galantamine on Animal Model Memory and Behavior Using 18F-FDG PET/MRI
Source: MDPI journal article supplement (doi:10.3390/cimb46050273), 2024-05-09
Supplement: s1 [file s1]

## Supplementary materials: Matricaria flower extract

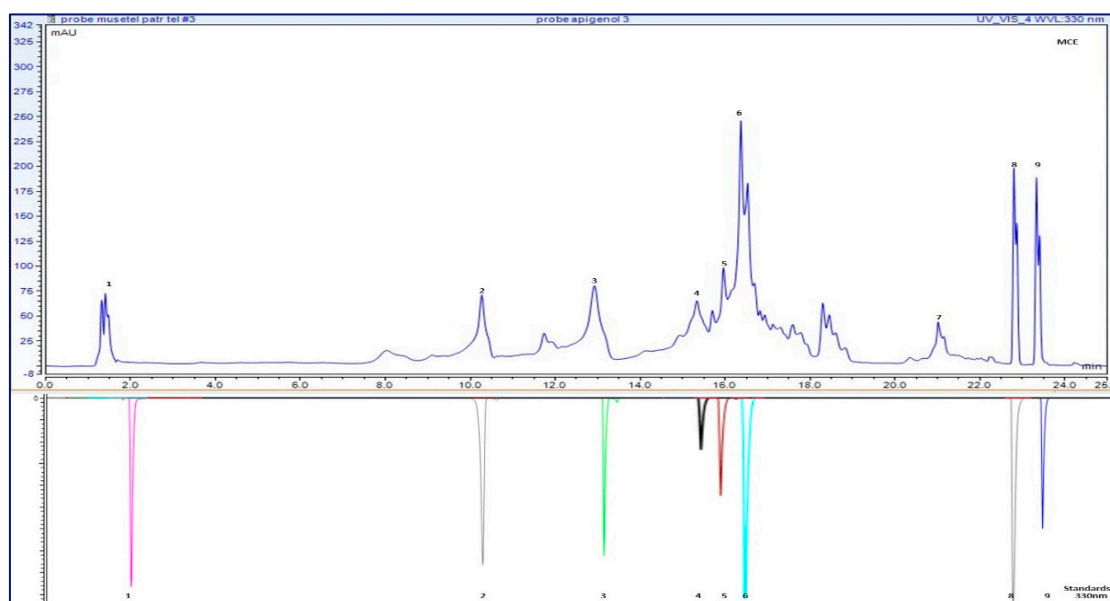

**Supplementary Figure S1.** MCE chromatogram indicating the most important peaks (the number of the compound is explained in the table below) and the reversed image for the standards at 330nm.

**Supplementary Table S1.** Retention time (Rt) for the used standards

| Standard (no)              | Rt (min) |
|----------------------------|----------|
| Chlorogenic acid (1)       | 2.570    |
| Caffeic acid (2)           | 10.217   |
| Rutoside (3)               | 12.893   |
| Hyperoside (4)             | 15.871   |
| Luteolin-7-O-glucoside (5) | 16.034   |
| Apigenin-7-O-glucoside (6) | 16.473   |
| Quercetin (7)              | 21.123   |
| Luteolin (8)               | 22.523   |
| Apigenin (9)               | 23.397   |

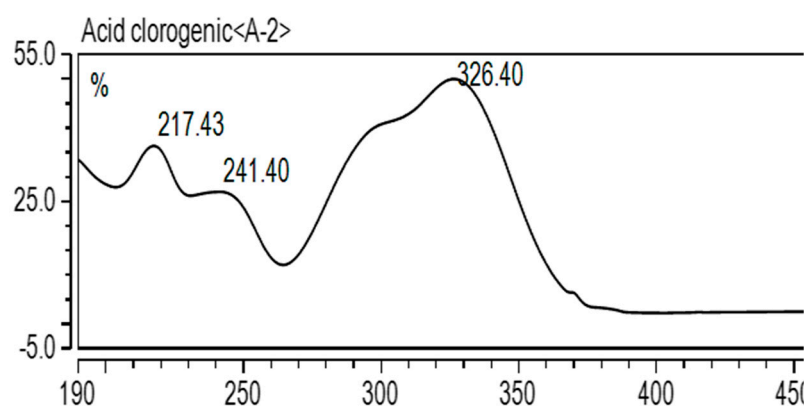

Supplementary Figure S2. UV spectrum for the Chlorogenic acid used standard

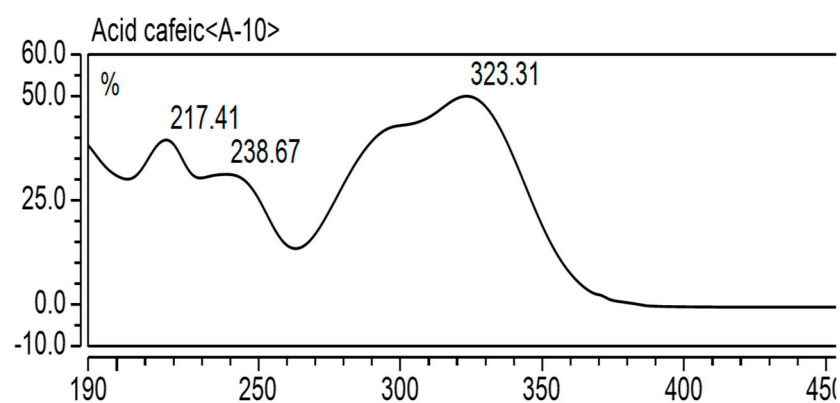

Supplementary Figure S3. UV spectrum for the Caffeic acid used standard

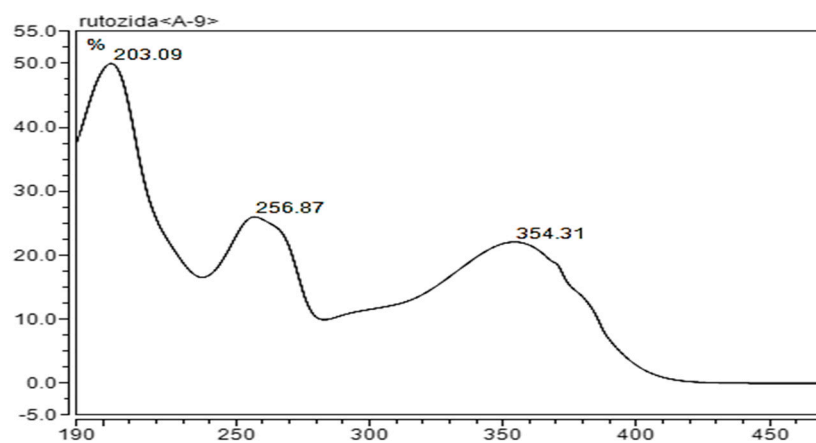

Supplementary Figure S4. UV spectrum for the Rutoside used standard

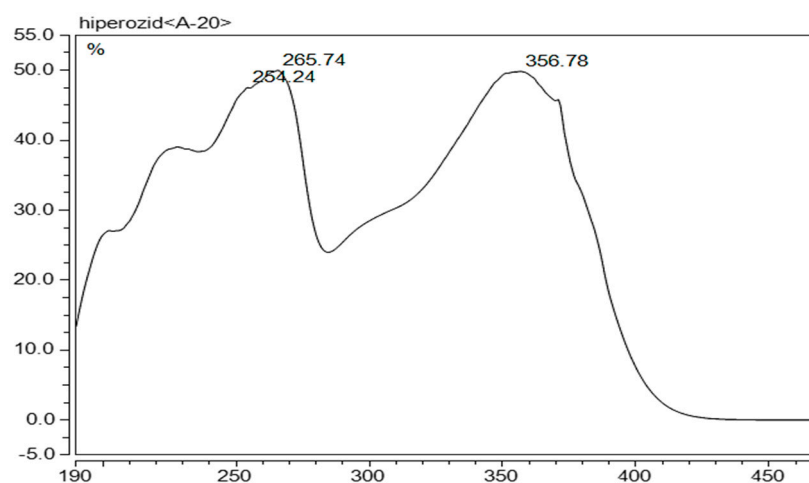

**Supplementary Figure S5.** UV spectrum for the Hyperoside used standard

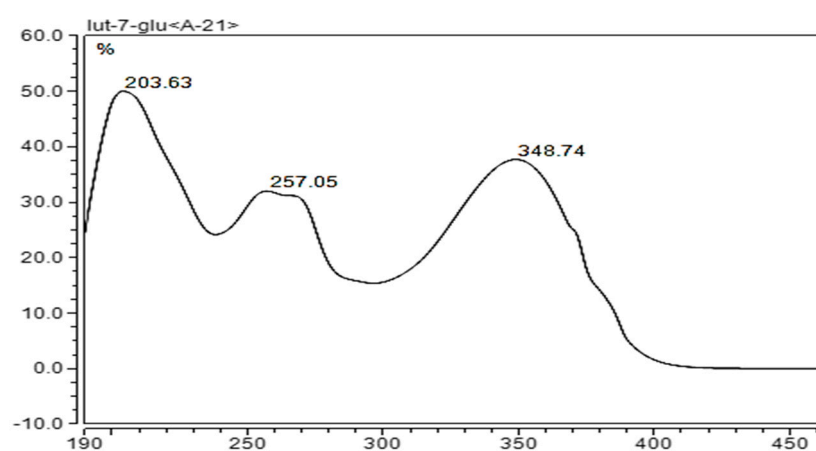

**Supplementary Figure S6.** UV spectrum for the Luteolin-7-O-glucoside used standard

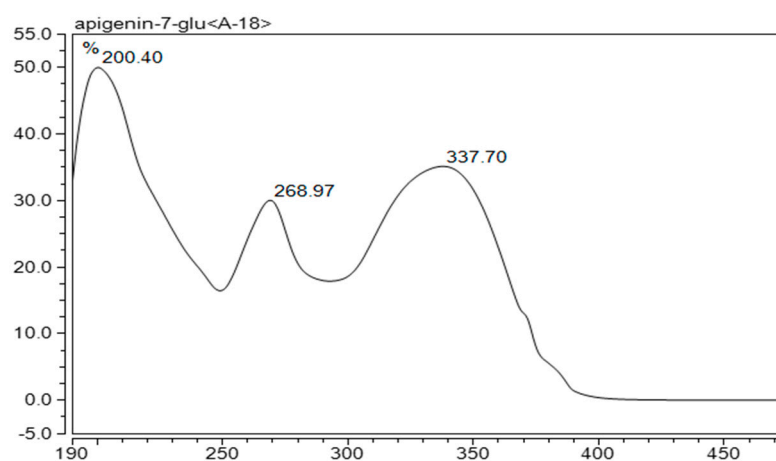

**Supplementary Figure S7.** UV spectrum for the Apigenin-7-O-glucoside used standard

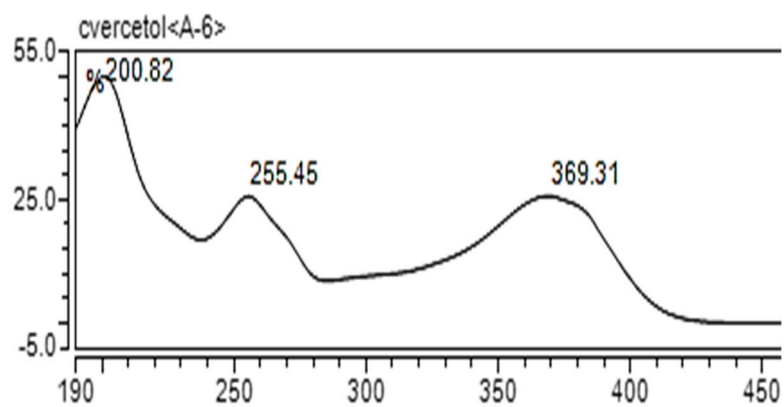

Supplementary Figure S8. UV spectrum for the Quercetin used standard

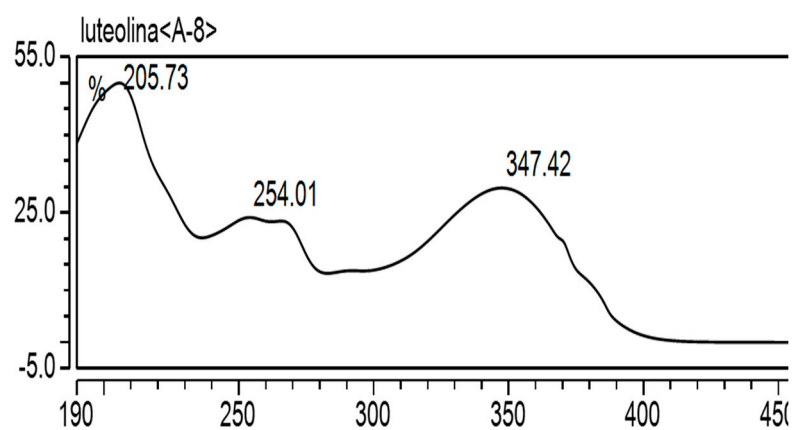

Supplementary Figure S9. UV spectrum for the Luteolin used standard

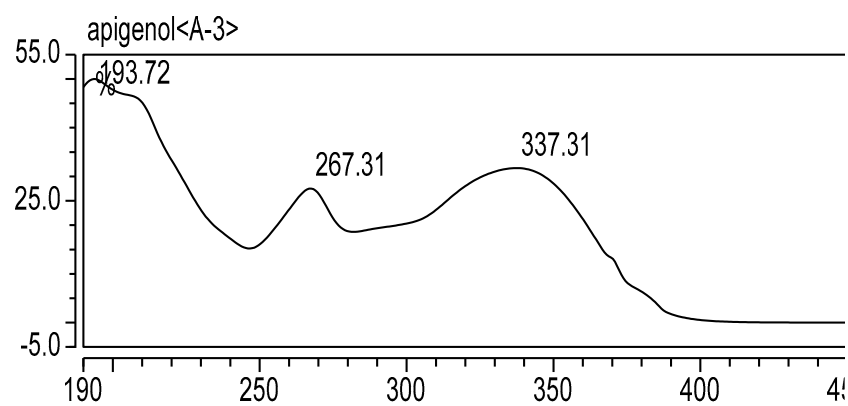

Supplementary Figure S10. UV spectrum for the Apigenin used standard
